# Supplementary material for: The biocompatible polythiophene-g-polycaprolactone copolymer as an efficient dopamine sensor platform
Source: Royal Society of Chemistry journal article supplement (doi:10.1039/c7py01326d), 2017-01-01
Supplement: c7py01326d1.pdf [file c7py01326d1.pdf]

# Supplementary Information

## Biocompatible polythiophene-*g*-polycaprolactone copolymer as efficient dopamine sensor platform

**Brenda G. Molina,<sup>1,2</sup> Anca D. Bendrea,<sup>3</sup> Luminita Cianga,<sup>3</sup> Elaine Armelin,<sup>1,2,\*</sup>**

**Luis J. del Valle,<sup>1,2</sup> Ioan Cianga,<sup>3,\*</sup> and Carlos Alemán<sup>1,2,\*</sup>**

<sup>1</sup> Departament d'Enginyeria Química, EEBE, Universitat Politècnica de Catalunya, C/ Eduard Maristany, 10-14, Ed. I2, 08019, Barcelona, Spain

<sup>2</sup> Barcelona Research Center for Multiscale Science and Engineering, Universitat Politècnica de Catalunya, C/ Eduard Maristany, 10-14, Ed. C, 08019, Barcelona, Spain

<sup>3</sup> Petru Poni” Institute of Macromolecular Chemistry, 41A, Grigore–Ghica Voda Alley, 700487, Iasi, Romania

Correspondence to: [elaine.armelin@upc.edu](mailto:elaine.armelin@upc.edu), [ioanc@icmpp.ro](mailto:ioanc@icmpp.ro) and [carlos.aleman@upc.edu](mailto:carlos.aleman@upc.edu)

**Table S1.** Reaction conditions<sup>a</sup> and hydrodynamic characteristics of Th-PCL macromonomer.

| <b>Initiator [I] × 10<sup>-2</sup>(mol/L) <sup>b</sup></b> | <b>Molar ratio [I]/[ε-CL]</b> | <b>Molar ratio [Sn(oct)<sub>2</sub>]/[I]</b> | <b>Mn<sub>th</sub></b> | <b>Mn<sub>H-NMR</sub> (DP<sub>n H-NMR</sub>)</b> | <b>Mn<sub>GPC</sub></b> | <b>PDI<sub>GPC</sub></b> |
|------------------------------------------------------------|-------------------------------|----------------------------------------------|------------------------|--------------------------------------------------|-------------------------|--------------------------|
| 61                                                         | 1/20                          | 1/200                                        | 2400                   | 2511 (21)                                        | 3120                    | 1.46                     |

<sup>a</sup>In bulk at 110°C for 24h, <sup>b</sup>I=3-thiophene methanol

The relative molecular weight and molecular weight distribution (PDI) were determined by gel permeation chromatography (GPC) using WGE SEC-3010 multidetection system, consisting of a pump, two PL gel columns (PLgel 5micro Mixed C Agilent and PLgel 5micro Mixed D Agilent), dual detector RI/VI (Refractometer/Viscometer) WGE SEC-3010, with chloroform (CHCl<sub>3</sub>), and flow rate of 1.0 ml/min at 30°C. The RI/VI detector was calibrated with PS standards (580-467,000 DA) having narrow molecular weight distribution. The system was also equipped with a UV detector WGE SEC-3010 and Bi-MwA Brookhaven multi-angle SLS detector. Data were analyzed using PARSEC Chromatography software.

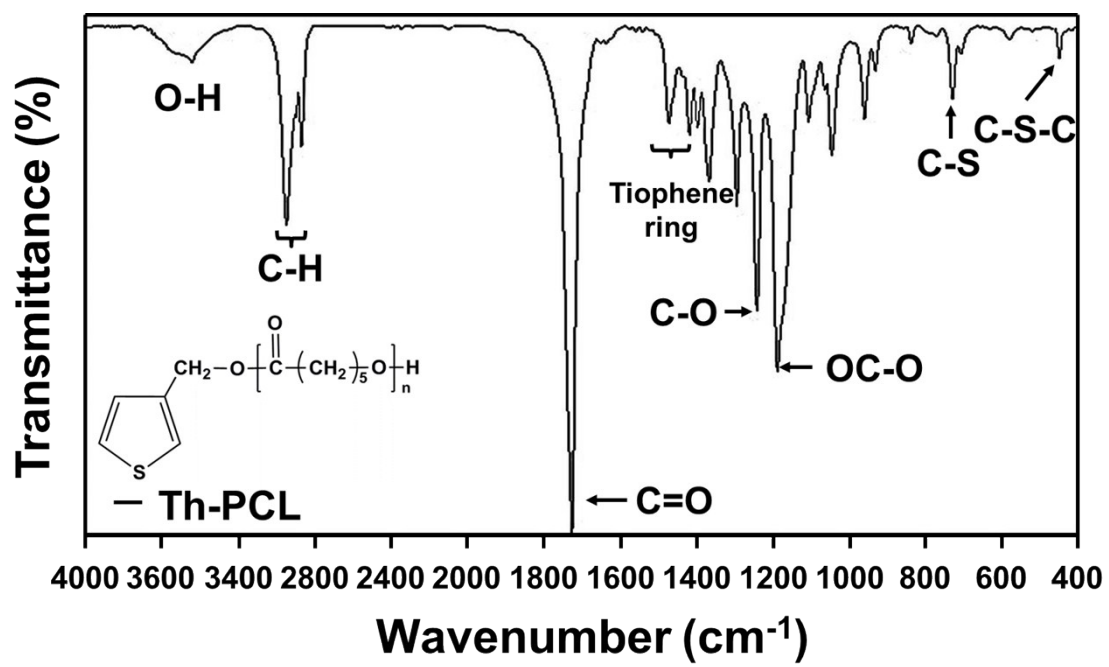

**Figure S1.** FTIR spectrum of Th-PCL macromonomer.

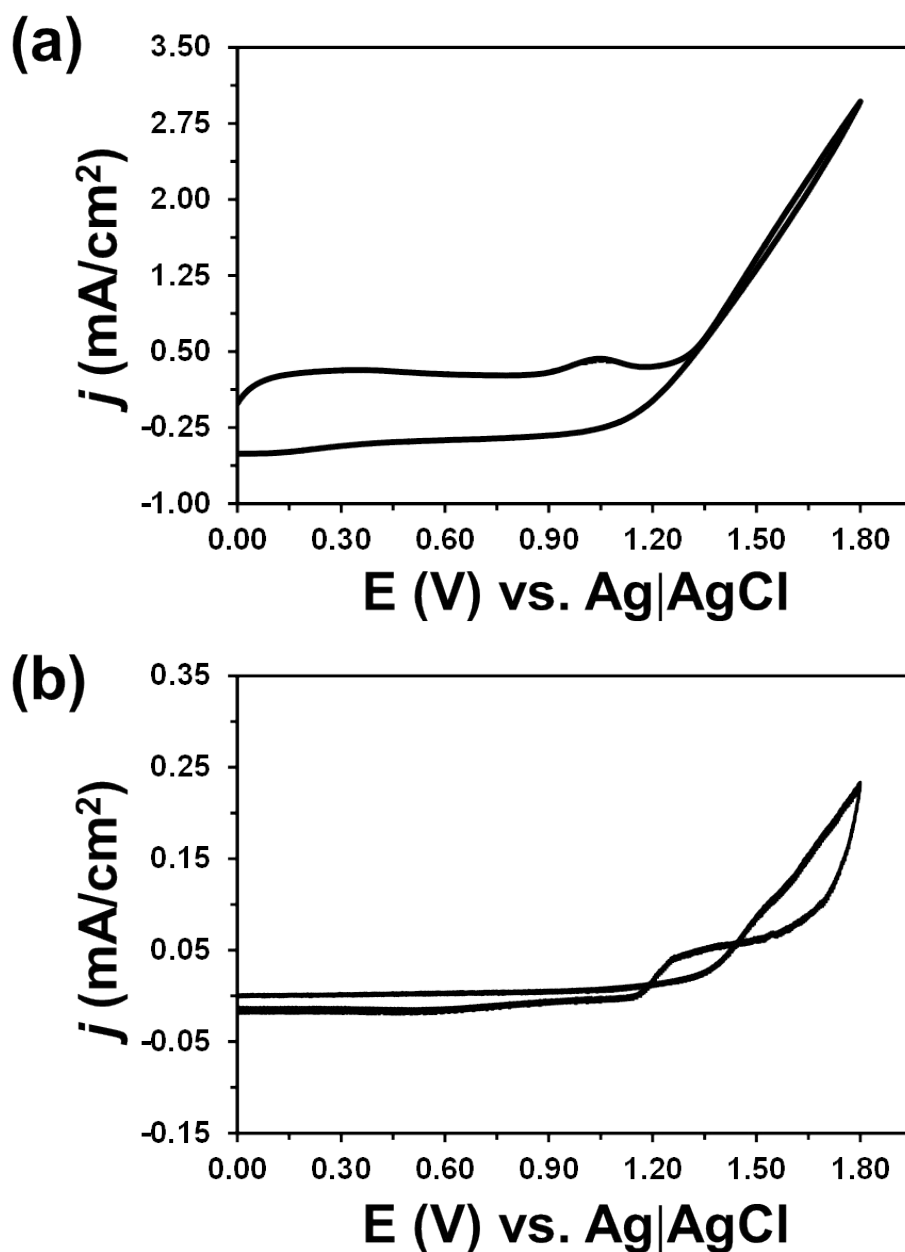

**Figure S2.** Control voltammogram for the oxidation of (a) HMeEDOT and (b) Th-PCL in acetonitrile with 0.1 M TBATFB). Voltammograms were recorded using a 0.5×0.5 cm<sup>2</sup> steel AISI 316 substrate as working electrode with an initial and final potential of 0.00 V, and + 1.80 V as reversal potential. The scan rate was 50 mV/s.

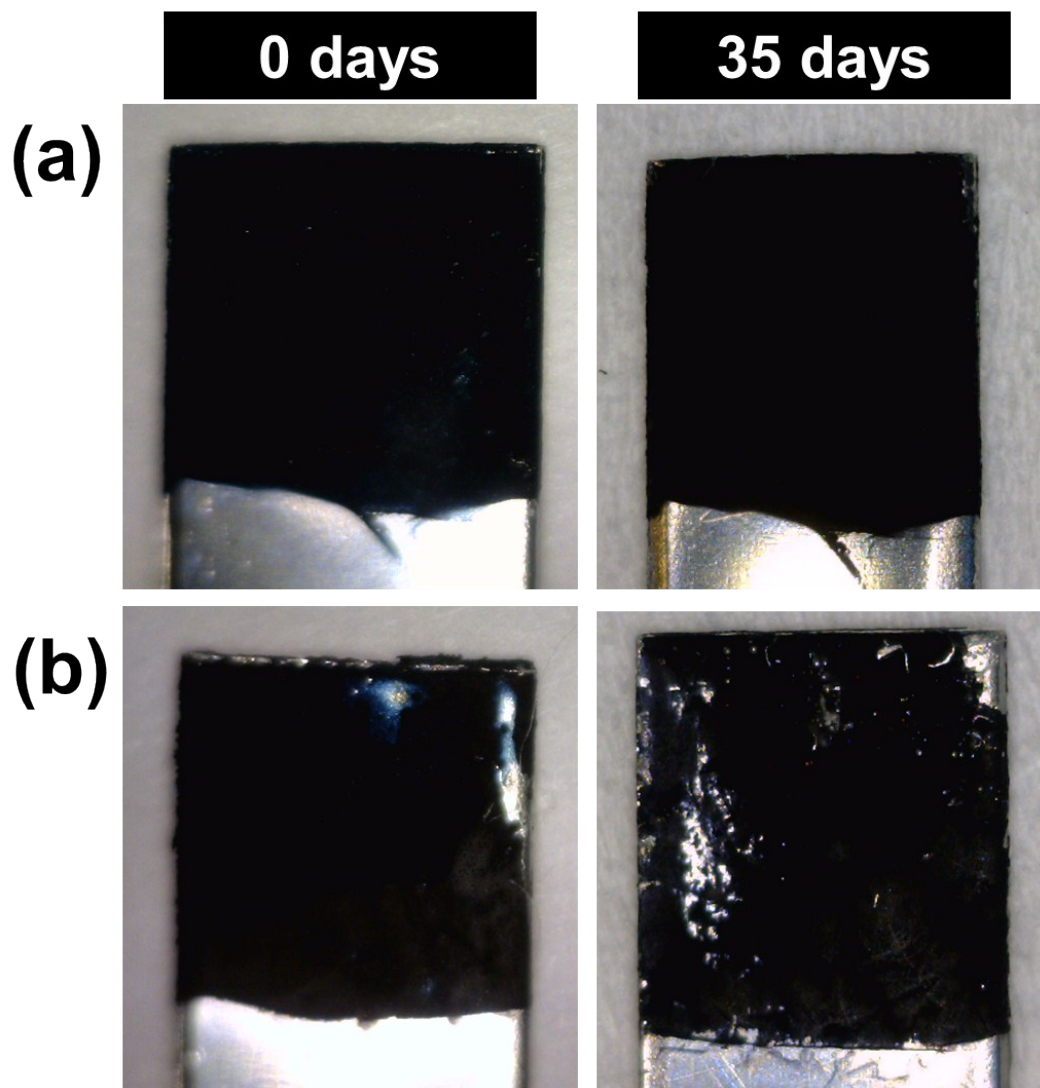

**Figure S3.** Photographs displaying (a) 80:20 PTh-g-PCL and (b) 60:40 PTh-g-PCL films before and after degradation assays (35 days in PBS, pH= 7.4, at 37 °C).

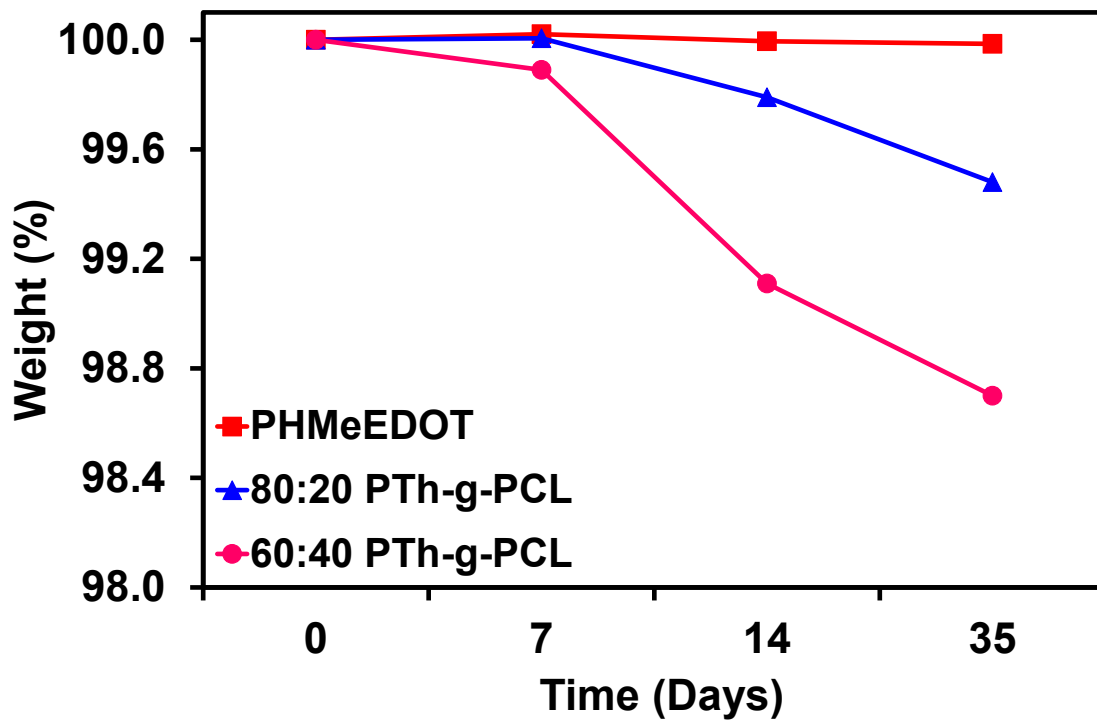

**Figure S4.** Degradation curves (PBS, pH= 7.4, at 37 °C) of PHMeEDOT, copolymer 80HMeDOT:20Th-PCL and 60HMeDOT:40Th-PCL.
